# Supplementary material for: Deuterium-isotope study on the reductive ring opening of benzylidene acetals
Source: Royal Society of Chemistry journal article supplement (doi:10.1039/c1ob06056b), 2011-01-01

## **Supplementary Information**

### **Deuterium-Isotope Study on the Reductive Ring Opening of Benzylidene Acetals**

I-Chi Lee, Medel Manuel L. Zulueta, Chi-Rung Shie,  
Susan D. Arco, and Shang-Cheng Hung\*

*Genomics Research Center, Academia Sinica, 128, Section 2, Academia Road, Taipei 115,  
Taiwan, Institute of Chemistry, University of the Philippines, Diliman, Quezon City 1101,  
Philippines, and Department of Applied Chemistry, National Chiao Tung University, 1001,  
Ta-Hsueh Road, Hsinchu 300, Taiwan*

### **Table of Contents**

|                                                                 |   |
|-----------------------------------------------------------------|---|
| A. General Procedures .....                                     | 2 |
| B. Synthesis of the Reference Compounds .....                   | 2 |
| C. Representative Procedures for Benzylidene Ring Opening ..... | 6 |
| D. NMR spectra ( $^1\text{H}$ and $^{13}\text{C}$ ) .....       | 8 |

## A. General Procedures

$\text{CH}_2\text{Cl}_2$  was purified and dried from a safe purification system filled with anhydrous  $\text{Al}_2\text{O}_3$ . Flash column chromatography was carried out on Silica Gel 60 (230–400 mesh, E. Merck). TLC was performed on pre-coated glass plates of Silica Gel 60 F254 (0.25 mm, E. Merck); detection was executed by spraying with a solution of  $\text{Ce}(\text{NH}_4)_2(\text{NO}_3)_6$ ,  $(\text{NH}_4)_6\text{Mo}_7\text{O}_{24}$ , and  $\text{H}_2\text{SO}_4$  in water and subsequent heating on a hot plate. The specific rotations are reported in  $10^{-1} \text{ deg cm}^2 \text{ g}^{-1}$ .  $^1\text{H}$  and  $^{13}\text{C}$  NMR spectra were recorded using 400 MHz and 600 MHz spectrometers. Chemical shifts are in ppm from  $\text{Me}_4\text{Si}$  calibrated using the resonance of the residual proton and carbon of  $\text{CDCl}_3$  (solvent). Proton peak assignments were performed using 2D NMR techniques ( $^1\text{H}$ - $^1\text{H}$  COSY, HMQC and NOESY) and/or guided by the assignment of known undeuterated derivatives; the hydrogen multiplicity of carbon peaks were determined using DEPT experiments.

## B. Synthesis of the Reference Compounds

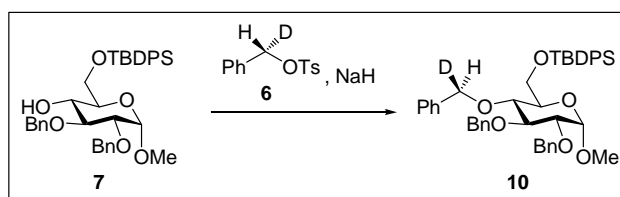

**Methyl 4-*O*-(*R*)-benzyl- $\alpha$ - $\text{d}_1$ -2,3-di-*O*-benzyl-6-*O*-*tert*-butyldiphenylsilyl- $\alpha$ - $\text{D}$ -glucopyranoside (10).** A mixture of methyl 2,3-di-*O*-benzyl-6-*O*-*tert*-butyldiphenylsilyl- $\alpha$ - $\text{D}$ -glucopyranoside **7** (120 mg, 0.196 mmol) and (*S*)-benzyl- $\alpha$ - $\text{d}_1$ -4-methylbenzenesulfonate (**6**, 32.1 mg, 0.122 mmol) was stirred in *N,N*-dimethylformamide (DMF, 1 mL) and  $\text{CH}_2\text{Cl}_2$  (1 mL) at room temperature under nitrogen atmosphere. The reaction flask was cooled to 0 °C, sodium hydride (60% dispersion in mineral oil, 14 mg, 0.35 mmol) was added to the mixture, and the reaction was gradually warmed up to room temperature. After stirring for 10 hours, Dowex® 50WX4-200 was added to quench the reaction, the whole mixture was filtered through Celite, and the filtrate was evaporated under reduced pressure. The crude residue was purified by flash column chromatography (ethyl acetate/hexanes = 1/4, v/v) to obtain the product **10** (79 mg, 64%).  $[\alpha]_{\text{D}}^{27} +10.0$  (c 0.3 in  $\text{CHCl}_3$ ); IR ( $\text{CHCl}_3$ )  $\nu$  3031, 2930, 1454, 1159, 1105, 822, 738, 700  $\text{cm}^{-1}$ ;  $^1\text{H}$  NMR (600 MHz,  $\text{CDCl}_3$ )  $\delta$  7.67–7.64 (4 H, m, Ar-H), 7.40–7.26 (16 H, m, Ar-H), 7.23–7.22 (3 H, m, Ar-H), 7.12–7.10 (2 H, m, Ar-H), 4.95, 4.81, (2 H, ABq,  $J = 10.7$  Hz,  $\text{PhCH}_2$ ), 4.80, 4.69

(2 H, ABq,  $J = 12.0$  Hz, PhCH<sub>2</sub>), 4.64 (1 H, d,  $J = 3.5$  Hz, 1-H), 4.55 (1 H, s, PhCHD), 3.98 (1 H, t,  $J = 9.5$  Hz, 3-H), 3.86–3.81 (2 H, m, 6-H<sub>a</sub>, 6-H<sub>b</sub>), 3.69–3.66 (1 H, m, 5-H), 3.58 (1 H, t,  $J = 9.5$  Hz, 4-H), 3.53 (1 H, dd,  $J = 9.5, 3.5$  Hz, 2-H), 3.35 (3 H, s, OCH<sub>3</sub>), 1.01 (9 H, s, *t*-Bu); <sup>13</sup>C NMR (150 MHz, CDCl<sub>3</sub>) δ 138.7 (C), 138.3 (C), 138.2 (C), 135.8 (CH), 135.6 (CH), 133.6 (C), 133.3 (C), 129.6 (CH), 129.5 (CH), 128.4 (CH), 128.35 (CH), 128.1 (CH), 128.0 (CH), 127.9 (CH), 127.6 (CH), 127.5 (CH), 97.8 (CH), 82.3 (CH), 80.2 (CH), 77.8 (CH), 75.9 (CH<sub>2</sub>), 74.9/74.7/74.6 (CHD), 73.3 (CH<sub>2</sub>), 71.4 (CH), 62.9 (CH<sub>2</sub>), 54.8 (CH<sub>3</sub>), 26.8, (CH<sub>3</sub>) 19.3 (C); HRMS [ESI, MNa<sup>+</sup>] calcd for C<sub>44</sub>H<sub>49</sub>DO<sub>6</sub>SiNa 726.3337, found 726.3329.

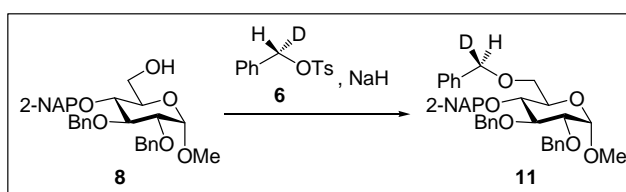

**Methyl 6-O-(R)-benzyl- $\alpha$ -d<sub>1</sub>-2,3-di-O-benzyl-4-O-(2-naphthylmethyl)- $\alpha$ -D-glucopyranoside (11).** A mixture of methyl 2,3-di-O-benzyl-4-O-(2-naphthylmethyl)- $\alpha$ -D-glucopyranoside (**8**, 307 mg, 0.60 mmol) and tosylate **6** (188 mg, 0.72 mmol) was stirred in DMF (1 mL) and CH<sub>2</sub>Cl<sub>2</sub> (1 mL) at room temperature under nitrogen atmosphere. The reaction flask was cooled to 0 °C, sodium hydride (60% dispersion in mineral oil, 48 mg, 1.19 mmol) was added to the mixture, and the reaction was gradually warmed up to room temperature. After stirring for 2 hours, Dowex® 50WX4-200 was added to quench the reaction, the whole mixture was filtered through Celite, and the filtrate was evaporated under reduced pressure. The crude residue was purified by flash column chromatography (ethyl acetate/hexanes = 1/4, v/v) to afford the product **11** (275 mg, 78%). [ $\alpha$ ]<sub>D</sub><sup>26</sup> +11.2 (*c* 1.1 in CHCl<sub>3</sub>); IR (CHCl<sub>3</sub>)  $\nu$  3030, 2923, 1453, 1274, 1160, 1049, 737, 698 cm<sup>-1</sup>; <sup>1</sup>H NMR (600 MHz, CDCl<sub>3</sub>) δ 7.80–7.71 (22 H, m, Ar-H), 4.99, 4.83 (2 H, ABq,  $J = 10.8$  Hz, ArCH<sub>2</sub>), 4.95, 4.61 (2 H, ABq,  $J = 10.8$  Hz, ArCH<sub>2</sub>), 4.79, 4.66 (2 H, ABq,  $J = 12.0$  Hz, ArCH<sub>2</sub>), 4.63 (1 H, d,  $J = 3.6$  Hz, 1-H), 4.41 (1 H, s, PhCHD), 4.00 (1 H, t,  $J = 9.3$  Hz, 3-H), 3.77–3.71 (2 H, m, 5-H, 6-H<sub>a</sub>), 3.68 (1 H, t,  $J = 9.3$  Hz, 4-H), 3.64 (1 H, d,  $J = 9.0$  Hz, 6-H<sub>b</sub>), 3.58–3.55 (1 H, m, 2-H), 3.37 (3 H, s, OCH<sub>3</sub>); <sup>13</sup>C NMR (150 MHz, CDCl<sub>3</sub>) δ 138.8 (C), 138.1 (C), 137.8 (C), 135.7 (C), 133.2 (C), 132.9 (C), 128.4 (CH), 128.38 (CH), 128.4 (CH), 128.1 (CH), 128.0 (CH), 127.9 (CH), 127.88 (CH), 127.7 (CH), 127.6 (CH), 127.56 (CH), 126.5 (CH), 126.0 (CH), 125.9 (CH), 125.8 (CH), 98.2 (CH), 82.2 (CH),

79.8 (CH), 77.6 (CH), 75.7 (CH<sub>2</sub>), 75.0 (CH<sub>2</sub>), 73.4 (CH<sub>2</sub>), 73.3/73.1/73.0 (CHD), 70.1 (CH), 68.4 (CH<sub>2</sub>), 55.2 (CH<sub>3</sub>); HRMS [ESI, MNa<sup>+</sup>] calcd for C<sub>39</sub>H<sub>39</sub>DO<sub>6</sub>Na 628.2785, found 628.2779.

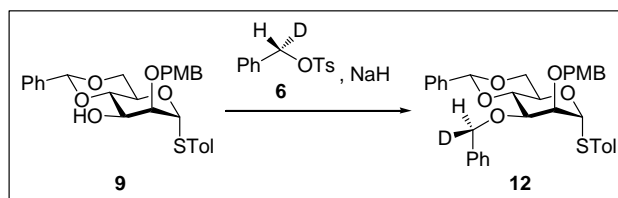

***p*-Methylphenyl 3-*O*-(*R*)-benzyl- $\alpha$ -d<sub>1</sub>-4,6-*O*-benzylidene-2-*O*-(4-methoxybenzyl)-1-thio- $\alpha$ -D-mannopyranoside (**12**).** A mixture of *p*-methylphenyl 4,6-*O*-benzylidene-2-*O*-(4-methoxybenzyl)-1-thio- $\alpha$ -D-mannopyranoside (**9**, 138 mg, 0.279 mmol) and tosylate **6** (73.2 mg, 0.279 mmol) was stirred in DMF (1 mL) and CH<sub>2</sub>Cl<sub>2</sub> (1 mL) at room temperature under nitrogen atmosphere. The reaction flask was cooled to 0 °C, sodium hydride (60% dispersion in mineral oil, 22.3 mg, 0.558 mmol) was added to the mixture, and the reaction was gradually warmed up to room temperature. After stirring for 3 hours, Dowex® 50WX4-200 was added to quench the reaction, the whole mixture was filtered through Celite, and the filtrate was evaporated under reduced pressure. The crude residue was purified by flash column chromatography (ethyl acetate/hexanes = 1/4, v/v) to get the product **12** (141 mg, 86%). [ $\alpha$ ]<sub>D</sub><sup>27</sup> +85.1 (*c* 0.5 in CHCl<sub>3</sub>); IR (CHCl<sub>3</sub>)  $\nu$  3032, 2900, 1612, 1514, 1454, 1249, 1100, 811, 698 cm<sup>-1</sup>; <sup>1</sup>H NMR (600 MHz, CDCl<sub>3</sub>)  $\delta$  7.51–7.49 (2 H, m, Ar-H), 7.38–7.23 (12 H, m, Ar-H), 7.09–7.08 (2 H, m, Ar-H), 6.84–6.82 (2 H, m, Ar-H), 5.62 (1 H, s, PhCH), 5.36 (1 H, s, 1-H), 4.63 (2 H, s, CH<sub>2</sub>PhOMe), 4.60 (1 H, s, PhCHD), 4.27–4.25 (3 H, m, 5-H, 6-H<sub>a</sub>), 4.21–4.19 (1 H, m, 4-H), 4.00 (1 H, s, 2-H), 3.94 (1 H, dd, *J* = 9.6, 3.4 Hz, 3-H), 3.86 (1 H, m, 6-H<sub>b</sub>), 3.79 (3 H, s, OCH<sub>3</sub>), 2.32 (3 H, s, CH<sub>3</sub>); <sup>13</sup>C NMR (150 MHz, CDCl<sub>3</sub>)  $\delta$  159.4 (C), 138.3 (C), 137.9 (C), 137.6 (C), 132.3 (CH), 129.9 (CH), 129.8 (CH), 128.8 (CH), 128.3 (CH), 128.2 (CH), 127.6 (CH), 127.58 (CH), 126.1 (CH), 113.8 (CH), 101.5 (CH), 87.5 (CH), 79.1 (CH), 77.4 (CH), 76.1 (CH), 72.8/72.7/72.5 (CHD), 72.6 (CH<sub>2</sub>), 68.5 (CH<sub>2</sub>), 65.4 (CH), 55.2 (CH<sub>3</sub>), 21.1 (CH<sub>3</sub>); HRMS [ESI, MNa<sup>+</sup>] calcd for C<sub>35</sub>H<sub>35</sub>DO<sub>6</sub>SNa 608.2193, found 608.2199.

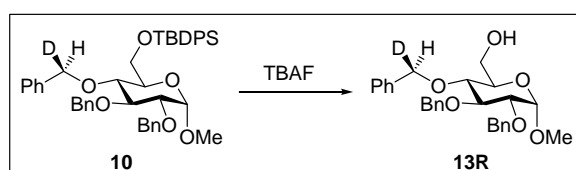

### Methyl 4-*O*-(*R*)-benzyl- $\alpha$ -d<sub>1</sub>-2,3-di-*O*-benzyl- $\alpha$ -D-glucopyranoside (**13R**).

Compound **10** (61 mg, 86.7  $\mu$ mol) was stirred in tetrahydrofuran (THF, 1 mL) at room temperature under nitrogen atmosphere. The reaction flask was cooled to 0 °C, and a 1 M solution of tetra-*n*-butylammonium fluoride (TBAF) in THF (2 mL, 2 mmol) was added to the mixture. After stirring for 16 hours, the whole mixture was filtered through Celite, and the filtrate was evaporated under reduced pressure. The crude residue was purified by flash column chromatography (ethyl acetate/hexanes = 1/4, v/v) to acquire the 6-alcohol **13R** (38.3 mg, 95%).  $[\alpha]_D^{27} +26.9$  (*c* 1.2 in CHCl<sub>3</sub>); IR (CHCl<sub>3</sub>)  $\nu$  3467, 3031, 2926, 1453, 1356, 1091, 740, 698 cm<sup>-1</sup>; <sup>1</sup>H NMR (400 MHz, CDCl<sub>3</sub>)  $\delta$  7.35–7.25 (15 H, m, Ar-H), 4.97 (1 H, d, *J* = 11.0 Hz, PhCH<sub>2</sub>), 4.81 (1 H, d, *J* = 11.1 Hz, PhCH<sub>2</sub>), 4.78 (1 H, d, *J* = 12.1 Hz, PhCH<sub>2</sub>), 4.64 (1 H, d, *J* = 12.1 Hz, PhCH<sub>2</sub>), 4.60 (1 H, s, PhCHD), 4.56 (1 H, d, *J* = 3.6 Hz, 1-H), 3.99 (1 H, t, *J* = 9.4 Hz, 3-H), 3.75 (1 H, ddd, *J* = 11.6, 5.4, 2.7 Hz, 6-H<sub>a</sub>), 3.70–3.61 (2 H, m, 6-H<sub>b</sub>, 5-H), 3.50 (1 H, dd, *J* = 9.6, 9.4 Hz, 4-H), 3.48 (1 H, dd, *J* = 9.4, 3.6 Hz, 2-H), 3.35 (3 H, s, OCH<sub>3</sub>); HRMS [ESI, MNa<sup>+</sup>] calcd for C<sub>28</sub>H<sub>31</sub>DO<sub>6</sub>Na 488.2159, found 488.2163.

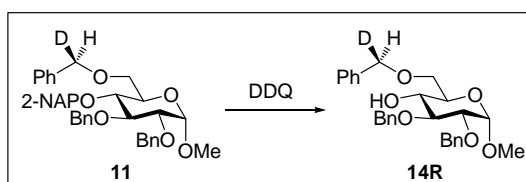

### Methyl 6-*O*-(*R*)-benzyl- $\alpha$ -d<sub>1</sub>-2,3-di-*O*-benzyl- $\alpha$ -D-glucopyranoside (**14R**).

Compound **11** (256 mg, 0.433 mmol) was stirred in CH<sub>2</sub>Cl<sub>2</sub> (9 mL) and water (0.5 mL) at room temperature. 2,3-Dichloro-5,6-dicyano-1,4-benzoquinone (DDQ, 294 mg, 1.30 mmol) was added to the mixture three times, one equivalent at a time, in half-hour intervals. After 4 hours, the mixture was filtered, and ethyl acetate and saturated NaHCO<sub>3(aq)</sub> was added. The organic layer was collected and evaporated under reduced pressure. The crude residue was purified by flash column chromatography (ethyl acetate/hexanes = 1/4, v/v) to afford the 4-alcohol **14R** (191 mg, 95%).  $[\alpha]_D^{29} +26.3$  (*c* 1.1 in CHCl<sub>3</sub>); IR (CHCl<sub>3</sub>)  $\nu$  3467, 3031, 2920, 1496, 1452, 1276, 1055, 738, 698 cm<sup>-1</sup>; <sup>1</sup>H NMR (600 MHz, CDCl<sub>3</sub>)  $\delta$  7.35–7.25 (15 H, m, Ar-H), 4.99, 4.72 (2 H, ABq, *J* = 11.4 Hz, PhCH<sub>2</sub>), 4.76, 4.65 (2 H, ABq, *J* = 12.1 Hz, PhCH<sub>2</sub>), 4.62 (1 H, d, *J* = 3.2 Hz, 1-H), 4.51 (1 H, s, PhCHD), 3.77 (1 H, t, *J* = 9.3 Hz, 3-H), 3.70–3.65 (3 H, m, 5-H, 6-H<sub>a</sub>, 6-H<sub>b</sub>), 3.59 (1 H, td, *J* = 9.3, 2.0, Hz, 4-H), 3.52 (1 H, dd, *J* = 9.3, 3.3, Hz, 2-H), 3.37 (3 H, s, OCH<sub>3</sub>), 2.30 (1 H, d, *J* = 2.0 Hz, 4-OH); HRMS [ESI, MNa<sup>+</sup>] calcd for C<sub>28</sub>H<sub>31</sub>DO<sub>6</sub>Na 488.2159, found 488.2162.

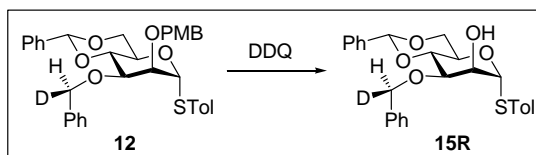

***p*-Methylphenyl 3-*O*-(*R*)-benzyl- $\alpha$ -d<sub>1</sub>-4,6-*O*-benzylidene-1-thio- $\alpha$ -D-manno-pyranoside (**15R**).** Compound **12** (76.2 mg, 0.13 mmol) was stirred in CH<sub>2</sub>Cl<sub>2</sub> (2.74 mL) and water (0.15 mL) at room temperature. DDQ (60 mg, 0.26 mmol) was added to the mixture twice, one equivalent at a time, in half-hour interval. After 4 hours, the mixture was filtered, and ethyl acetate and saturated NaHCO<sub>3(aq)</sub> was added. The organic layer was collected and evaporated under reduced pressure. The crude residue was purified by flash column chromatography (ethyl acetate/hexanes = 1/3, v/v) to get the 2-alcohol **15R** (56 mg, 93%). [ $\alpha$ ]<sub>D</sub><sup>27</sup> +209.9 (*c* 1.2 in CHCl<sub>3</sub>); IR (CHCl<sub>3</sub>)  $\nu$  3459, 3033, 2899, 1493, 1453, 1210, 1099, 1018, 749, 698 cm<sup>-1</sup>; <sup>1</sup>H NMR (600 MHz, CDCl<sub>3</sub>)  $\delta$  7.53–7.49 (2 H, m, Ar-H), 7.40–7.30 (10 H, m, Ar-H), 7.11 (2 H, d, *J* = 8.0 Hz, Ar-H), 5.61 (1 H, s, PhCH), 5.51 (1 H, s, 1-H), 4.72 (1 H, s, PhCHD), 4.34 (1 H, td, *J* = 9.6, 4.9 Hz, 5-H), 4.27 (1 H, dd, *J* = 3.4, 1.0 Hz, 2-H), 4.20 (1 H, dd, *J* = 10.3, 4.9 Hz, 6-H<sub>a</sub>), 4.16 (1 H, t, *J* = 9.6 Hz, 4-H), 3.95 (1 H, dd, *J* = 9.6, 3.4 Hz, 3-H), 3.84 (1 H, m, 6-H<sub>b</sub>), 2.84 (1 H, br s, 2-OH), 2.32 (3 H, s, CH<sub>3</sub>); HRMS [ESI, MNa<sup>+</sup>] calcd for C<sub>27</sub>H<sub>27</sub>DO<sub>5</sub>SNa 488.1618, found 488.1613.

### C. Representative Procedures for Benzylidene Ring Opening

**6-*O*-Ring opening by AlD<sub>3</sub>.** AlCl<sub>3</sub> (14.4 mg, 0.108 mmol) and LiAlD<sub>4</sub> (13.7 mg, 0.325 mmol) were mixed in ice-cold Et<sub>2</sub>O (1 mL). A solution of compound **1** (50 mg, 0.108 mmol) in CH<sub>2</sub>Cl<sub>2</sub> (1 mL) was added 5 minutes later and the reaction was allowed to warm up to room temperature. After 90 minutes of reaction, ethyl acetate (1 mL) was added followed by a few drops of water. The mixture was diluted with ethyl acetate, washed with water, dried over MgSO<sub>4</sub>, filtered, and concentrated under reduced pressure. The crude residue was purified by flash column chromatography (ethyl acetate/hexanes = 1/2, v/v) to obtain the target 6-alcohol(s) (44 mg, 88%).

**6-*O*-Ring opening by BD<sub>3</sub>•THF.** BF<sub>3</sub>•Et<sub>2</sub>O (292  $\mu$ L, 2.3 mmol) was added to a suspension of NaBD<sub>4</sub> (72 mg, 1.72 mmol) in THF (0.7 mL) at room temperature. After overnight stirring, compound **1** (106 mg, 0.23 mmol) and copper(II) trifluoromethanesulfonate (Cu(OTf)<sub>2</sub>, 4.2 mg, 12  $\mu$ mol) were sequentially added. The reaction was allowed to proceed for 7 hours and, then, quenched with methanol and Et<sub>3</sub>N.

The resulting mixture was filtered through Celite, concentrated under reduced pressure, and purified by flash column chromatography (ethyl acetate/hexanes = 1/2, v/v) to get the target 6-alcohol(s) (65.5 mg, 62%).

**4-O-Ring opening by Et<sub>3</sub>SiD.** Et<sub>3</sub>SiD (37 μL, 0.234 mmol) was added to a solution of compound **1** (54.1 mg, 0.117 mmol) in CH<sub>3</sub>CN (0.5 mL) at room temperature under nitrogen atmosphere. The reaction flask was immersed in an ice-bath, Cu(OTf)<sub>2</sub> (0.4 mg, 1 μmol) was added to the mixture, and the resulting solution was gradually warmed up to room temperature. After stirring for 30 minutes, the mixture was diluted with ethyl acetate and, after 1 hour of stirring, the resulting mixture was washed by saturated NaHCO<sub>3(aq)</sub>, dried over anhydrous MgSO<sub>4</sub>, and concentrated *in vacuo*. Purification of the residue *via* flash column chromatography (ethyl acetate/hexanes = 1/2) provided the target 4-alcohol(s) (35.4 mg, 65%).

**2-O-Ring opening by AlD<sub>3</sub>.** AlCl<sub>3</sub> (17.5 mg, 0.131 mmol) and LiAlD<sub>4</sub> (15 mg, 0.394 mmol) were mixed in Et<sub>2</sub>O (4 mL) at 0 °C. After 15 minutes, this mixture was added to an ice-cooled stirring solution of compound **16** (243 mg, 0.525 mmol) in CH<sub>2</sub>Cl<sub>2</sub>/Et<sub>2</sub>O (2/1, 12 mL). The ice-water bath was removed and the reaction was allowed to warm up to room temperature. Ethyl acetate (10 mL) was added 5 hours later and the solution was washed with water, dried over MgSO<sub>4</sub>, filtered, and concentrated under reduced pressure. The crude residue was purified by flash column chromatography (ethyl acetate/hexanes = 1/4, v/v) to obtain the target 2-alcohol(s) (179 mg, 73%).

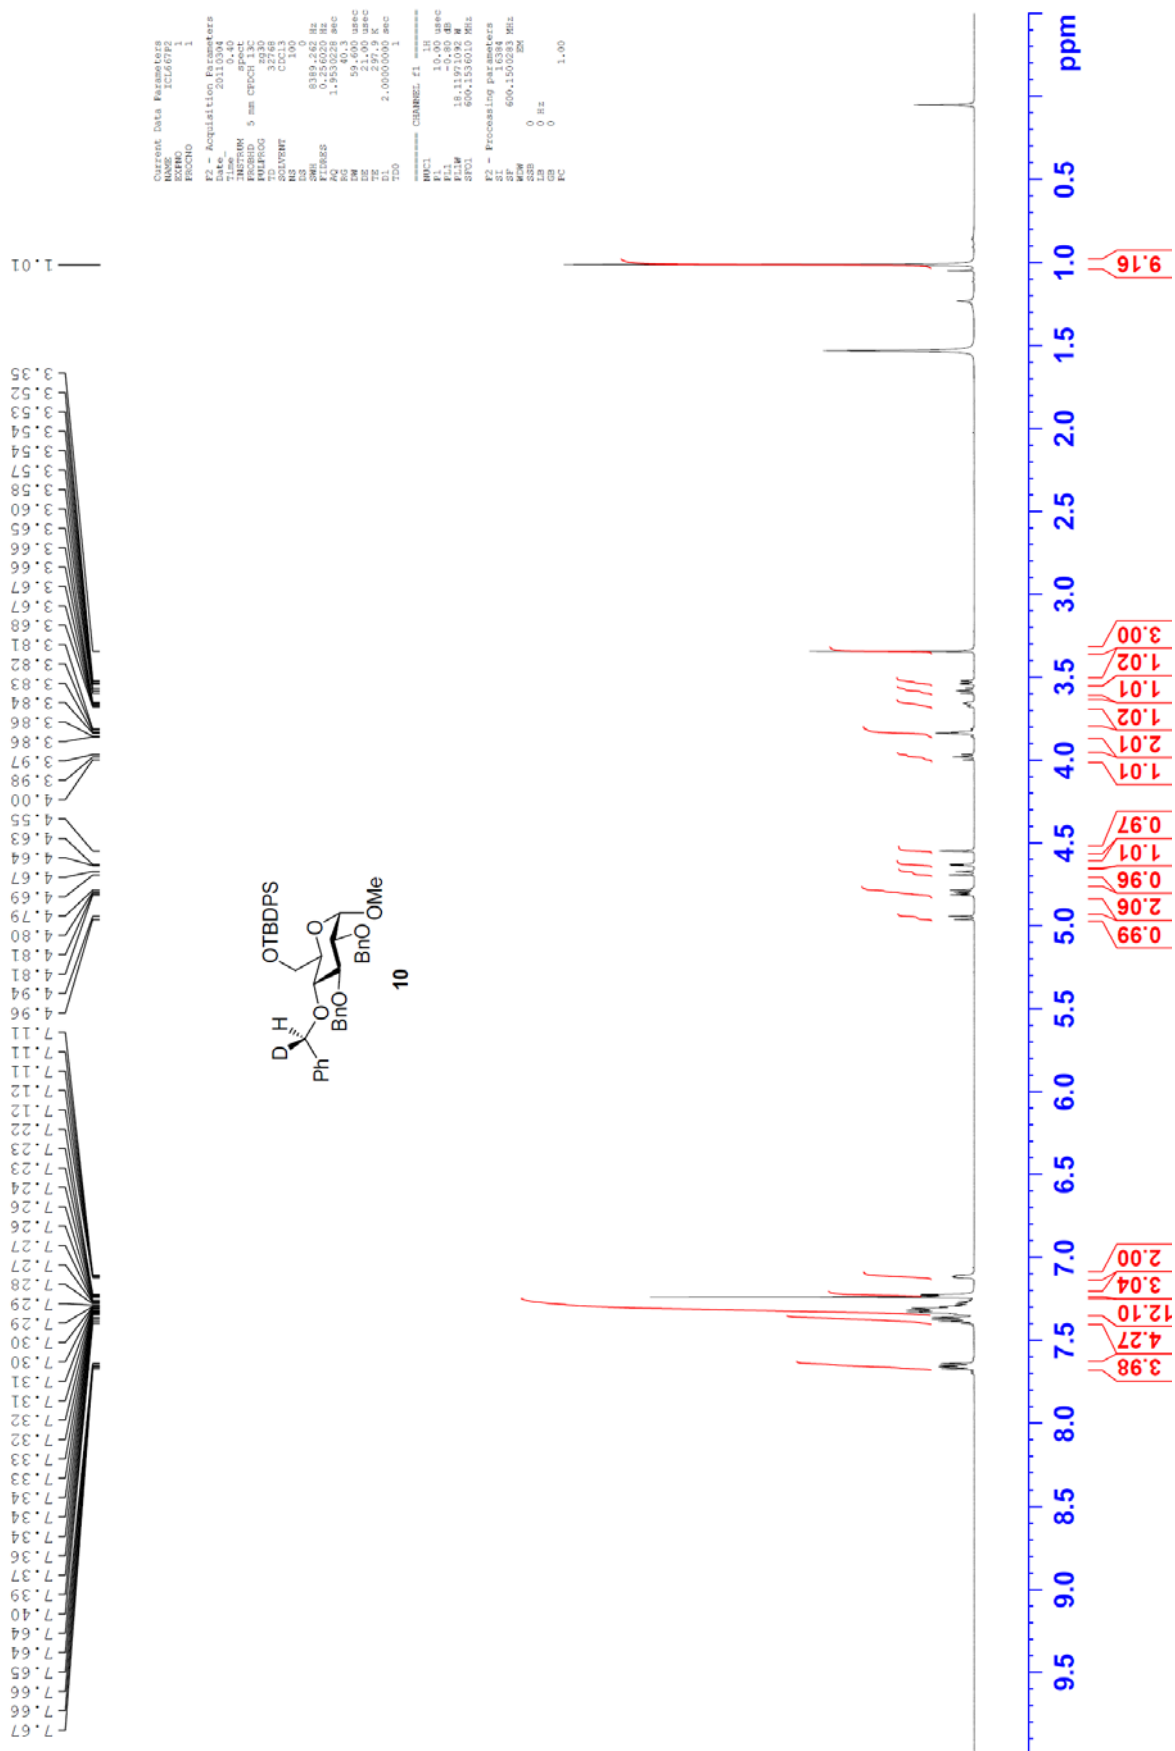



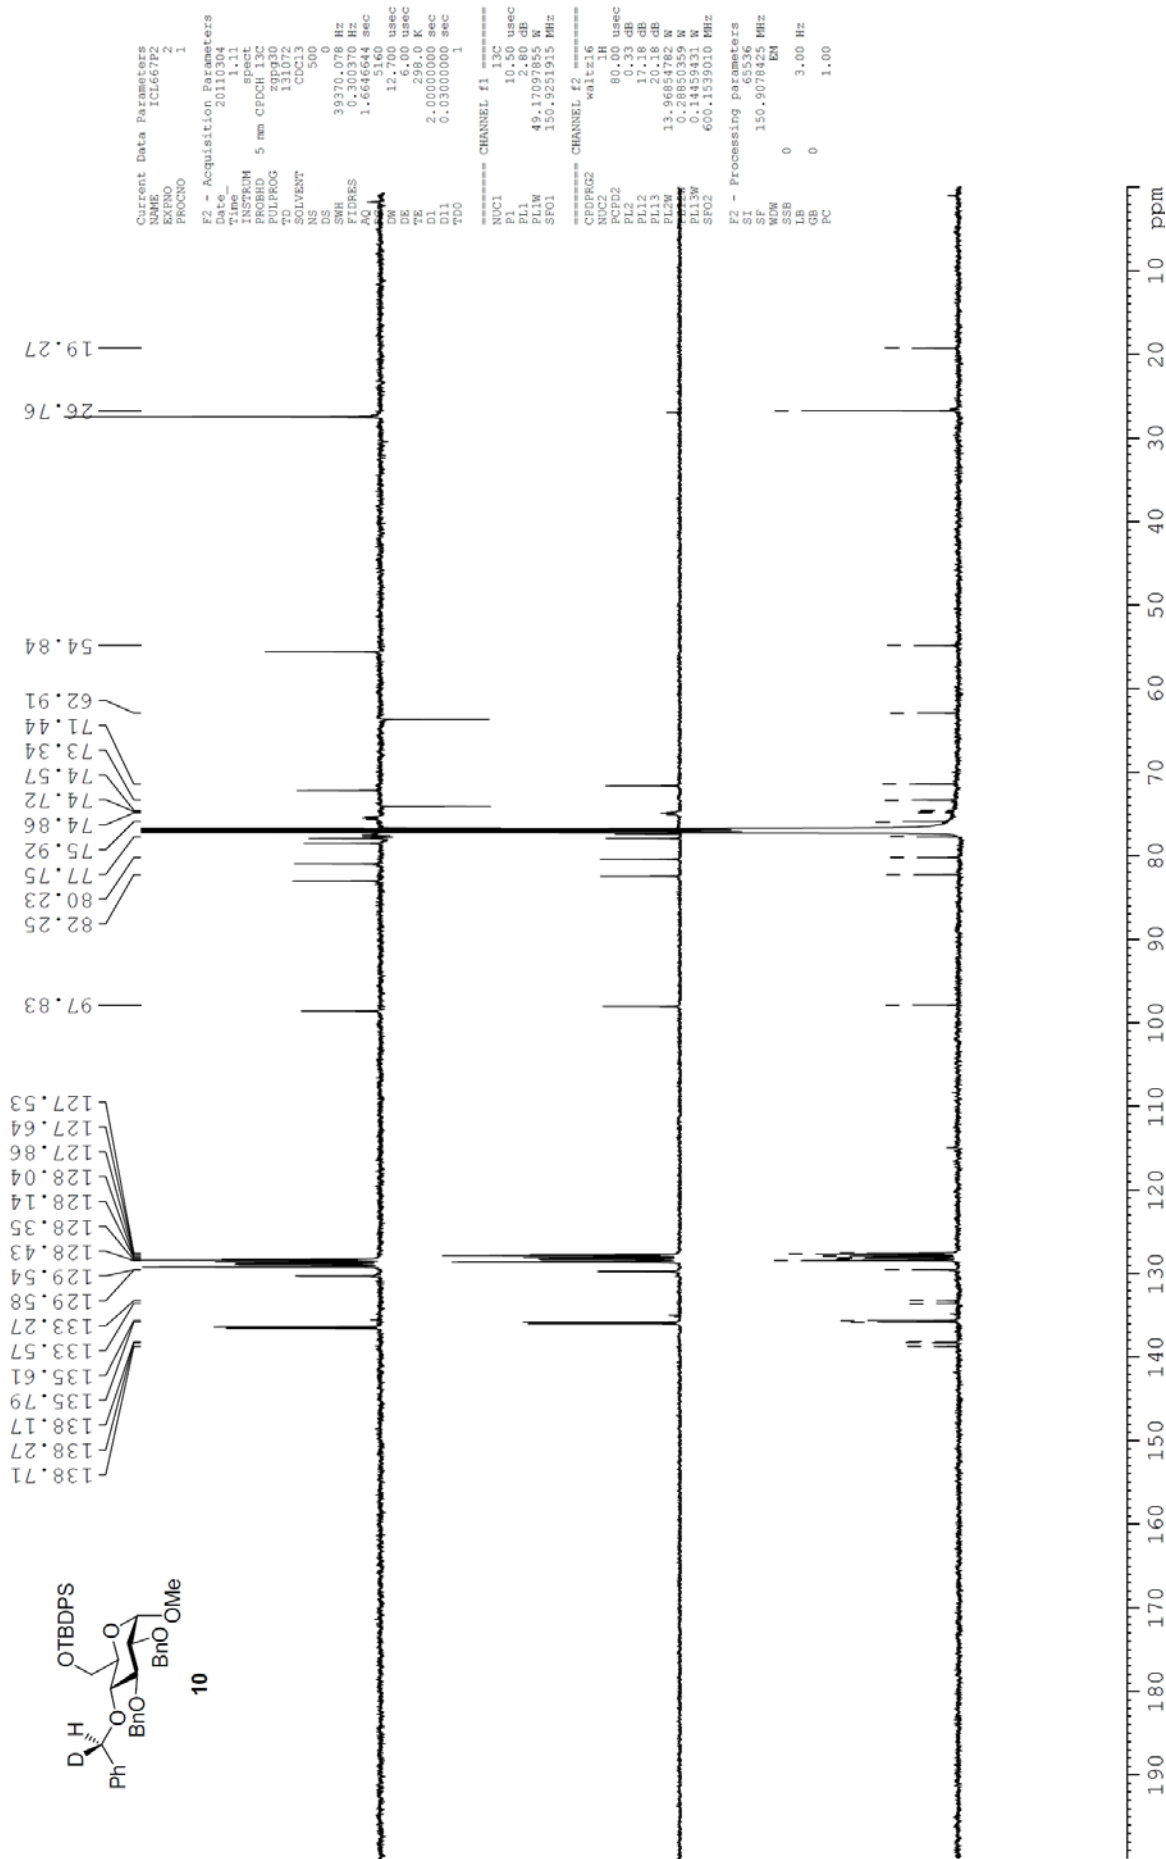

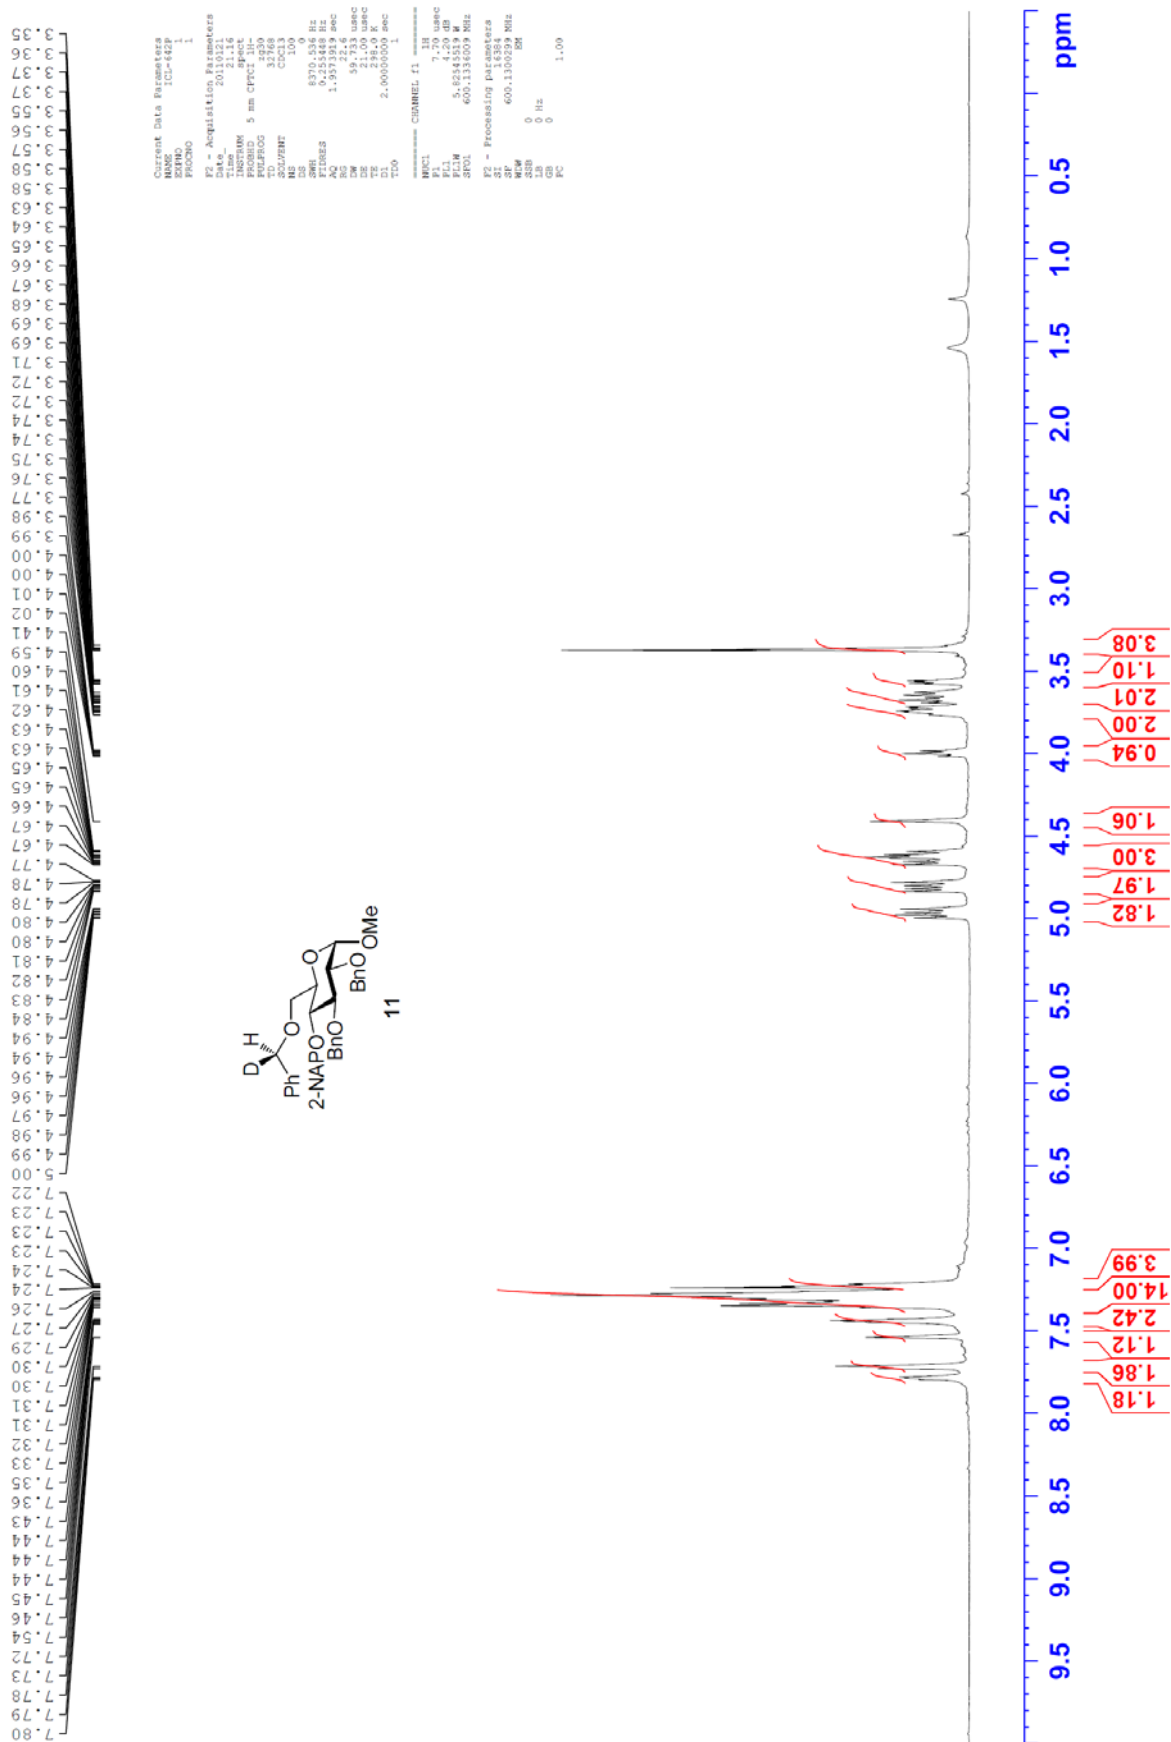

Current Data Parameters  
 NAME ICL-642P  
 EXPNO 2  
 PROCNO 1

F2 - Acquisition Parameters  
 Date\_ 20110123  
 Time\_ 21.54  
 INSTRUM spect  
 PROBHD 5 mm CFC1 IH-  
 PULPROG zgpg30  
 SOLVENT CDCl3  
 NS 500  
 DS 0  
 SWH 59062.500 Hz  
 FIDRES 0.27572 Hz  
 RG 1.677200  
 EC 2050  
 DM 12.800 usec  
 TE 21.00 usec  
 TD 298.0 K  
 D1 2.000000 sec  
 D11 0.030000 sec  
 TD0 1

===== CHANNEL f1 =====  
 NUC1 13C  
 P1 10.00 usec  
 PL1 -1.80 dB  
 PL1W 122.22216797 N  
 SFO1 150.9201600 MHz

===== CHANNEL f2 =====  
 C1P1RG2 wait= 1H  
 NUC2 1H  
 PCPD2 90.00 usec  
 EL2 4.00 dB  
 PL12 25.13 dB  
 PL13 6.0945000 dB  
 PL12W 0.0470212 N  
 PL13W 0.02356839 N  
 SFO2 600.1339008 MHz

F2 - Processing parameters  
 SI 65536  
 SF 150.9028159 MHz  
 MDW 0  
 SSB 0  
 LB 0  
 GB 0  
 PC 1.00

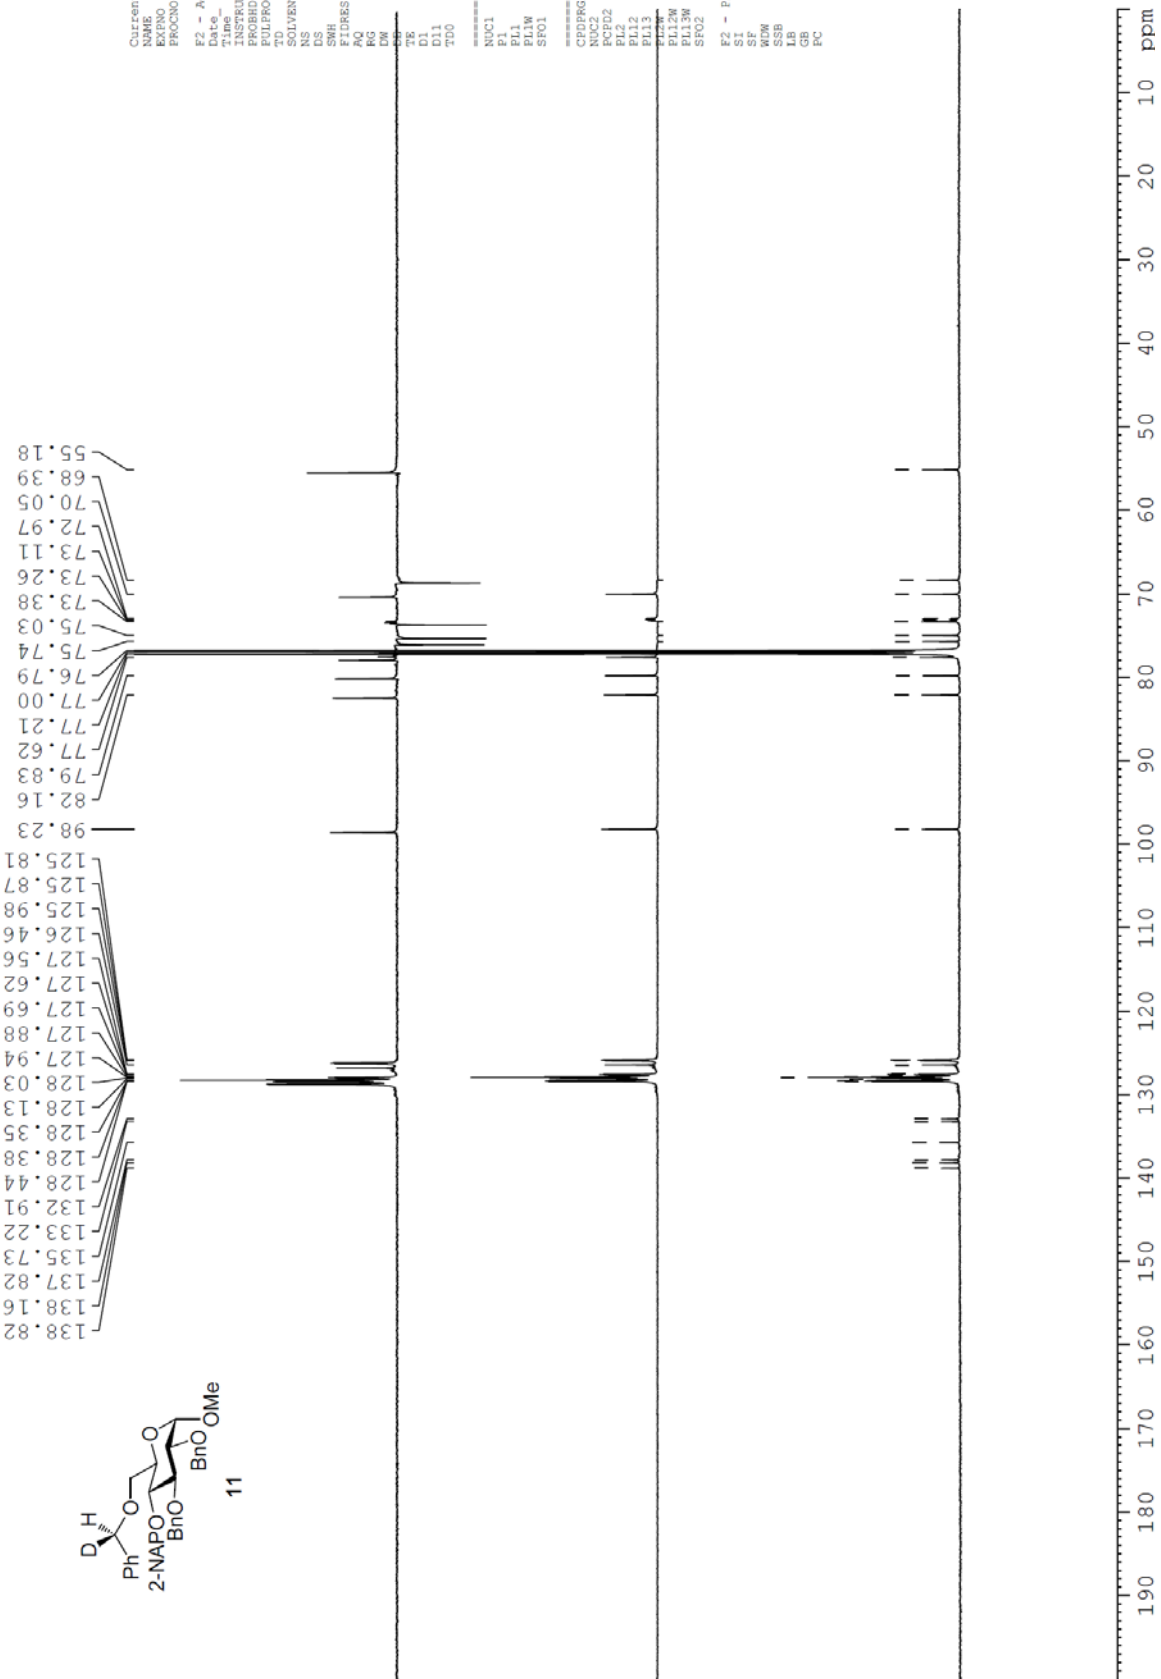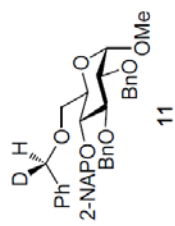

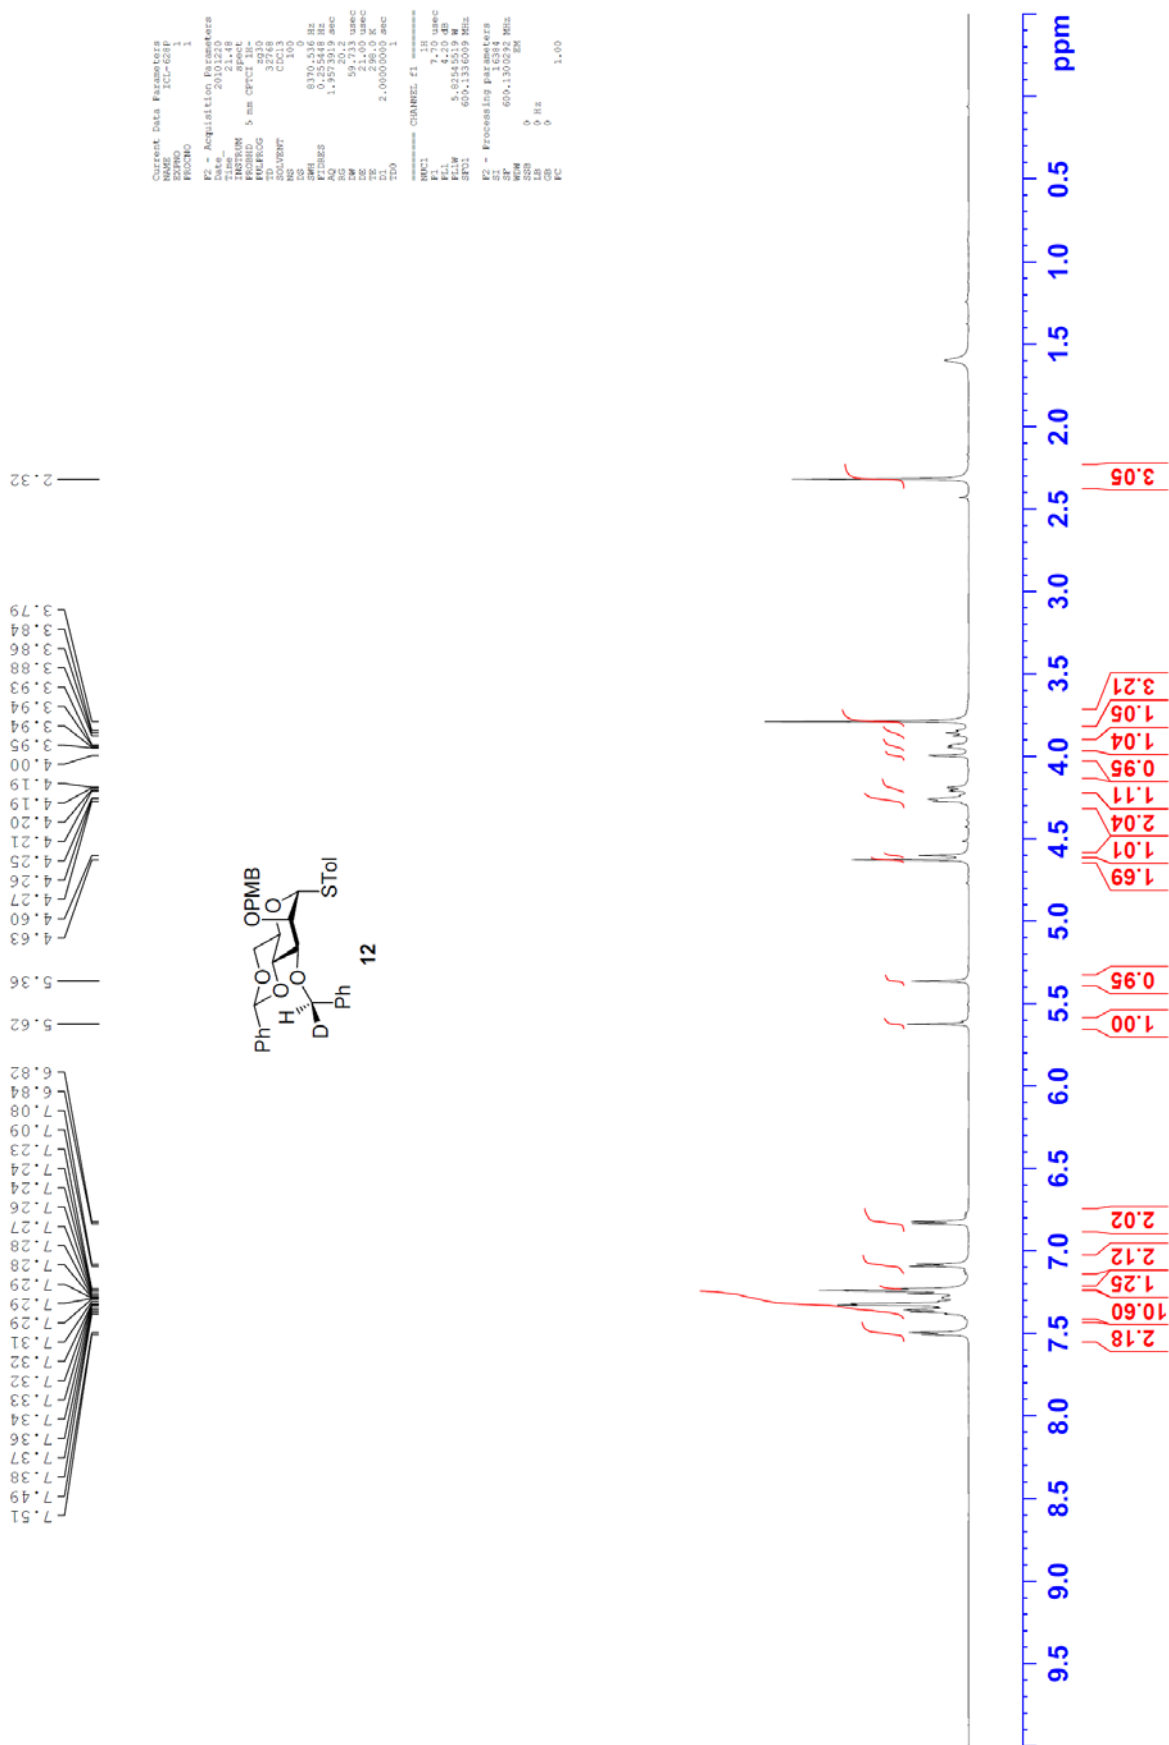

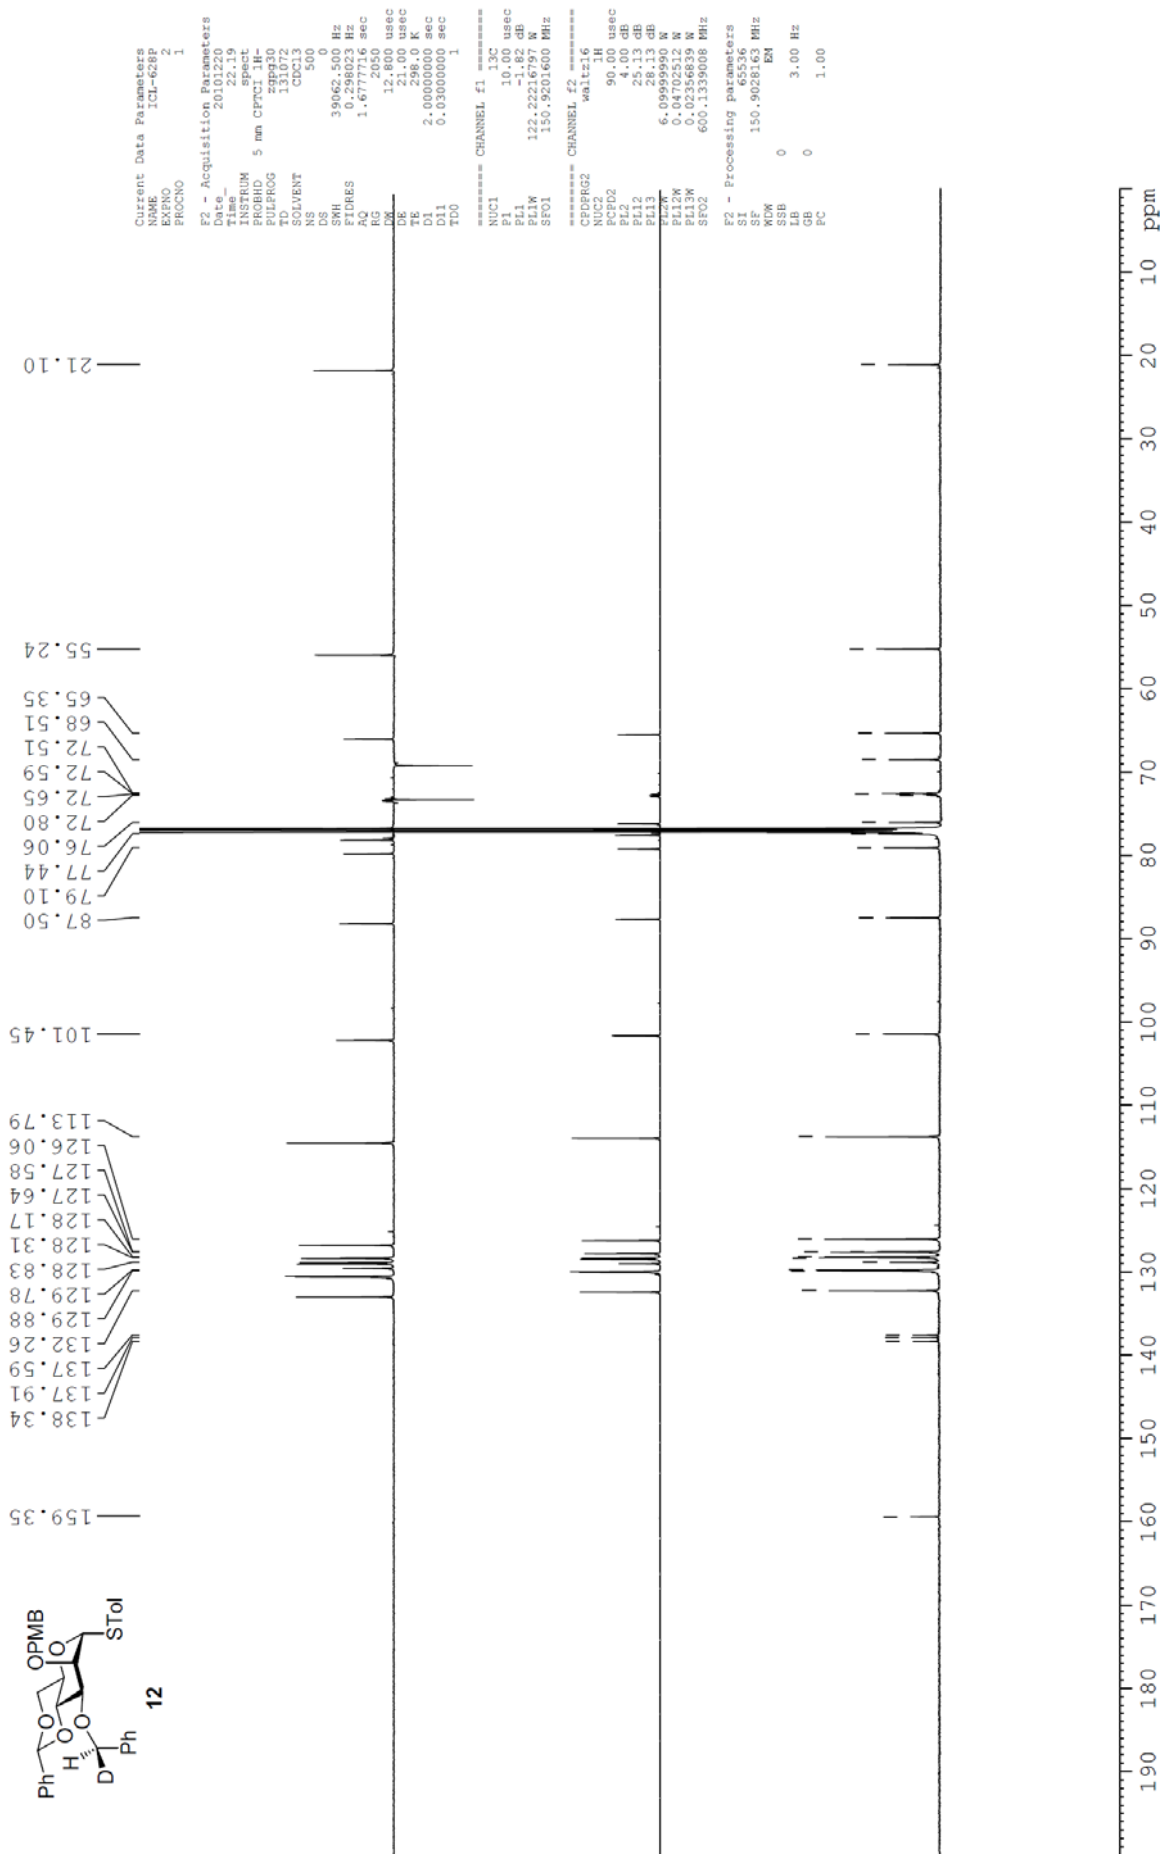

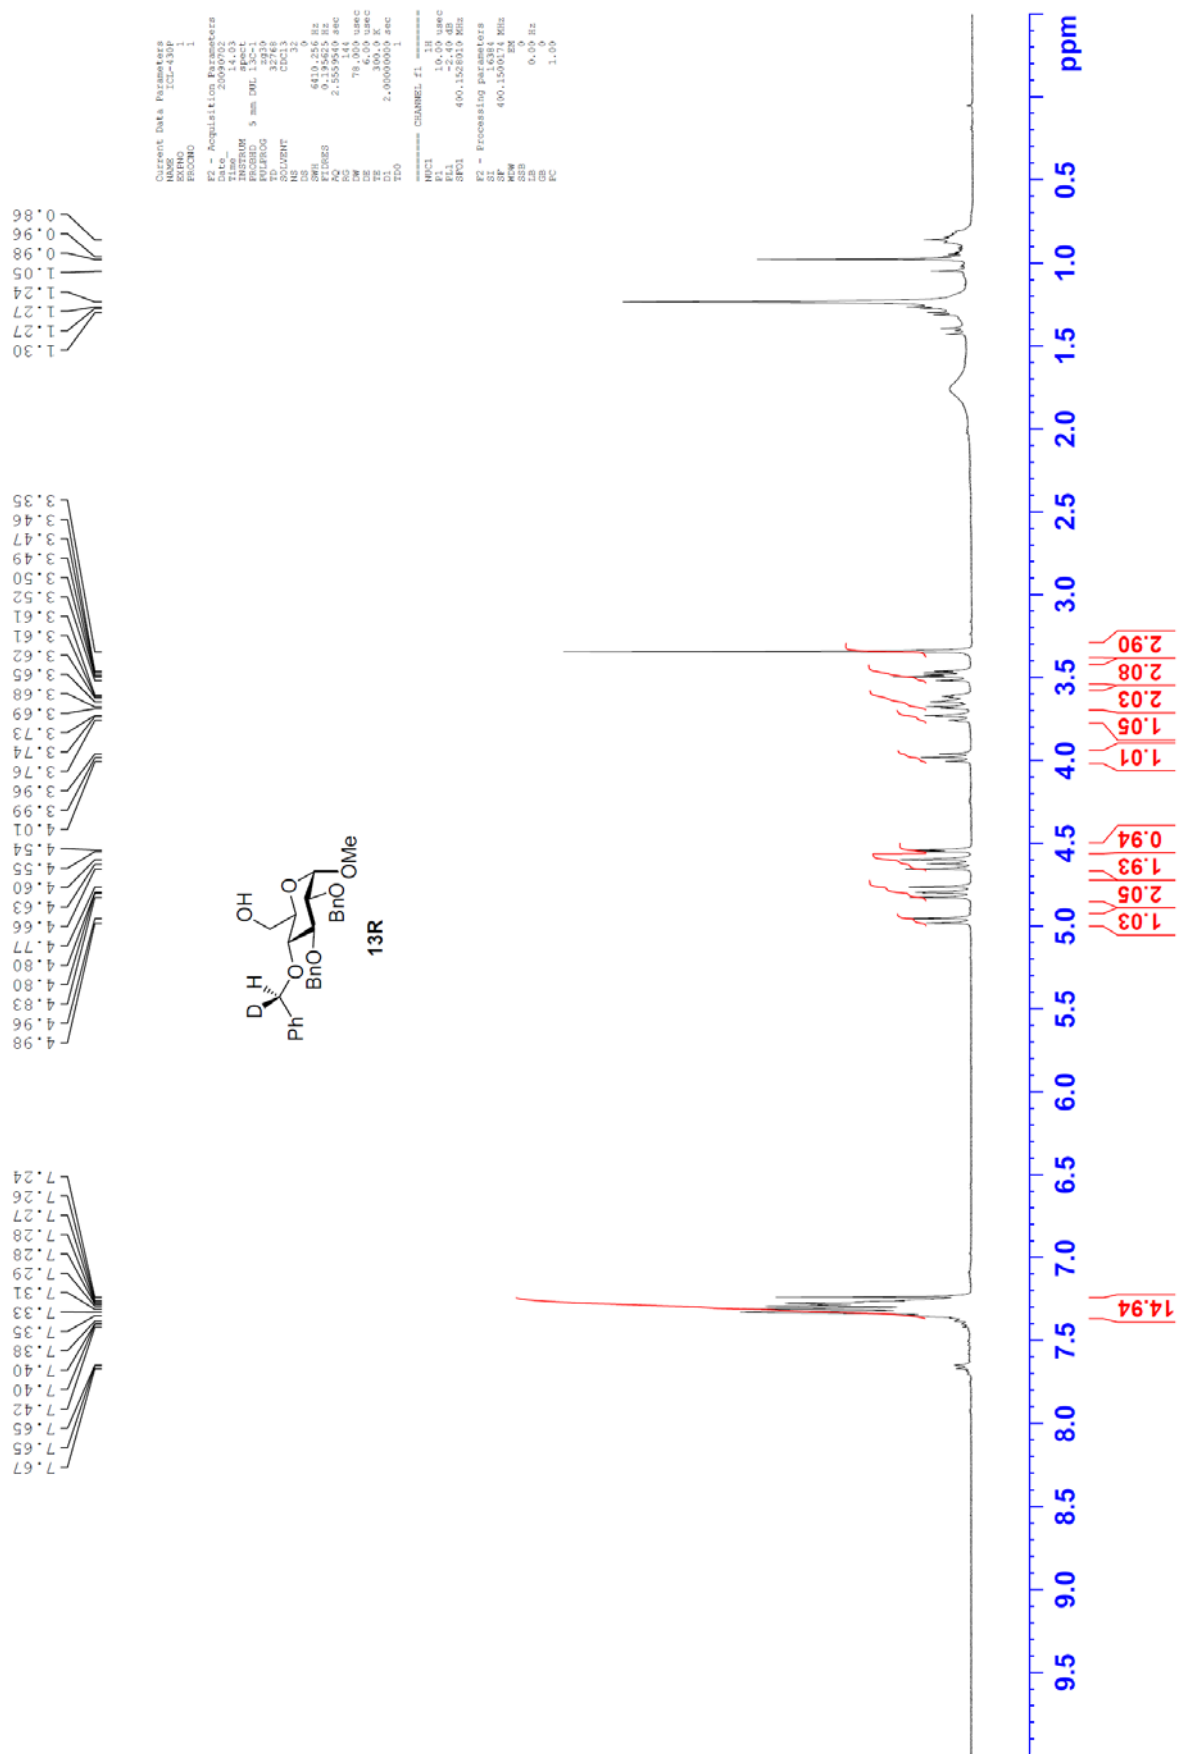

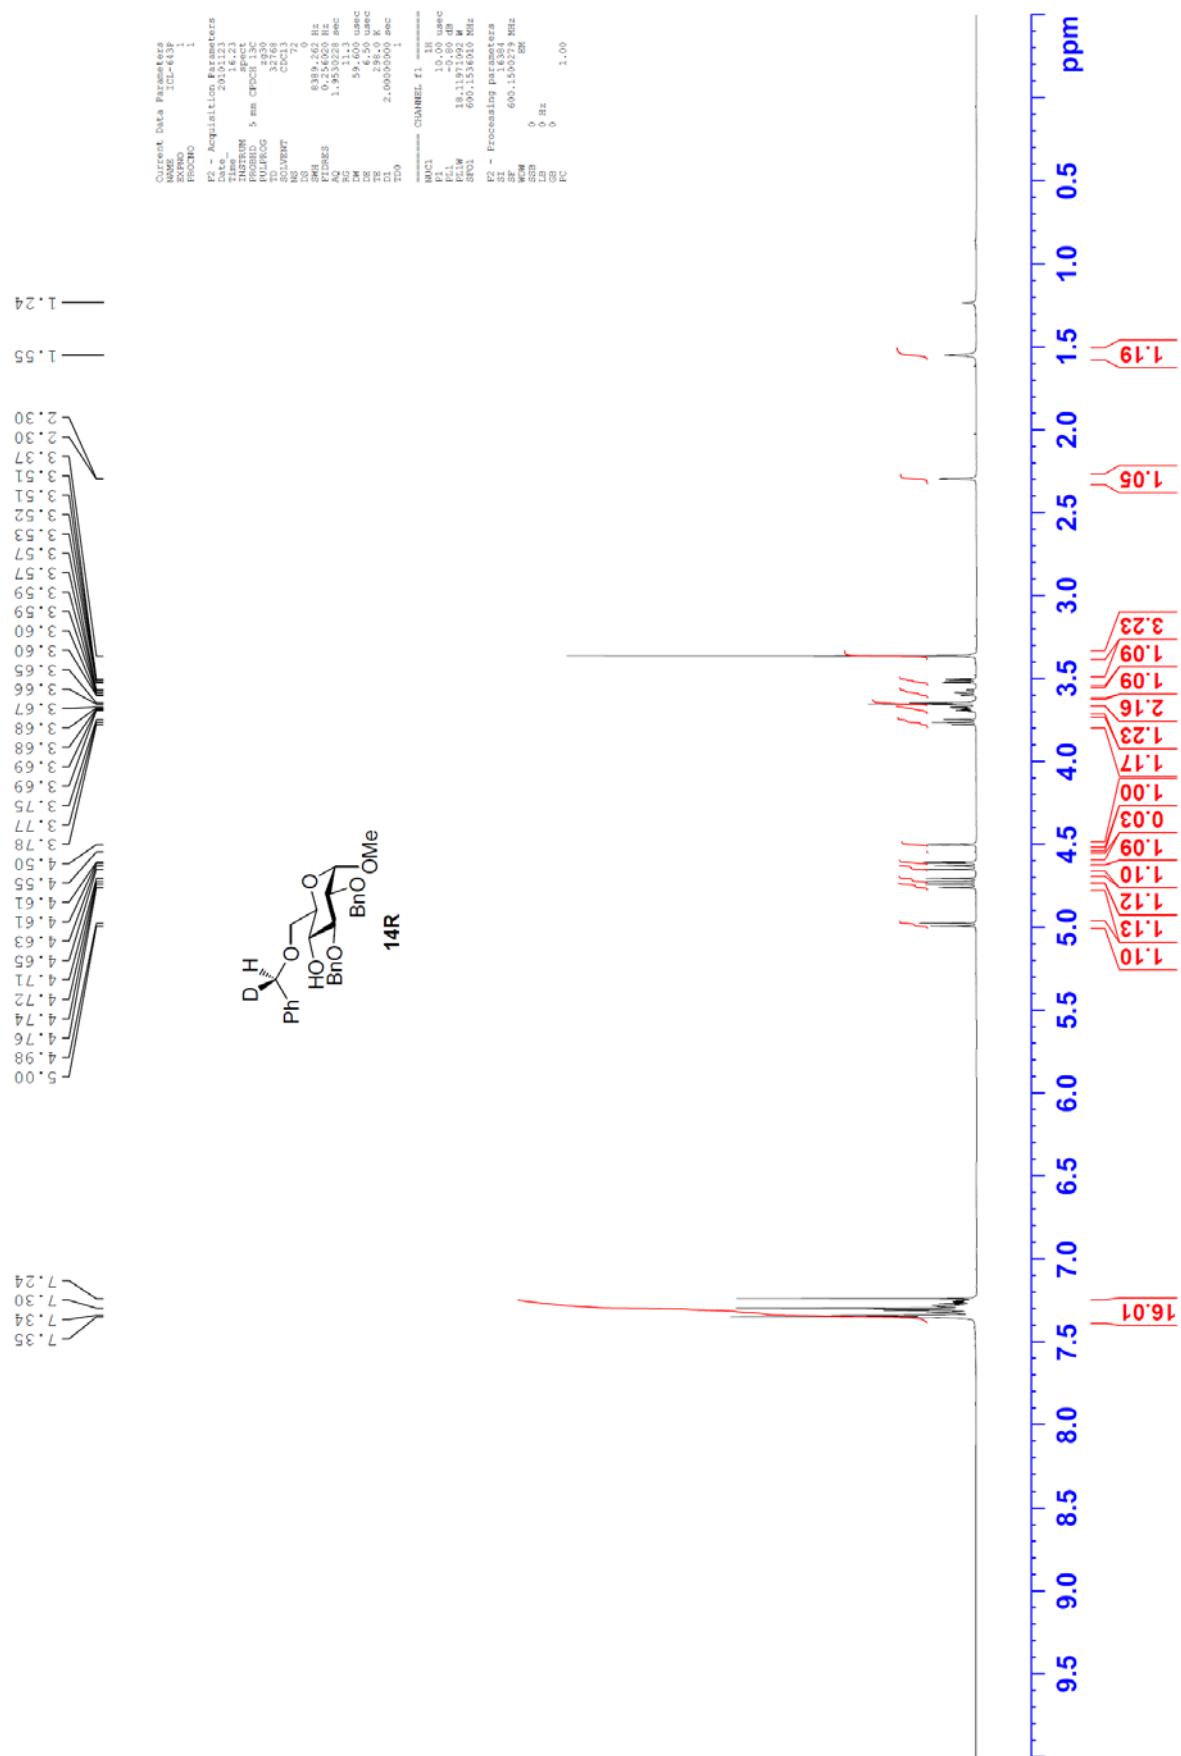

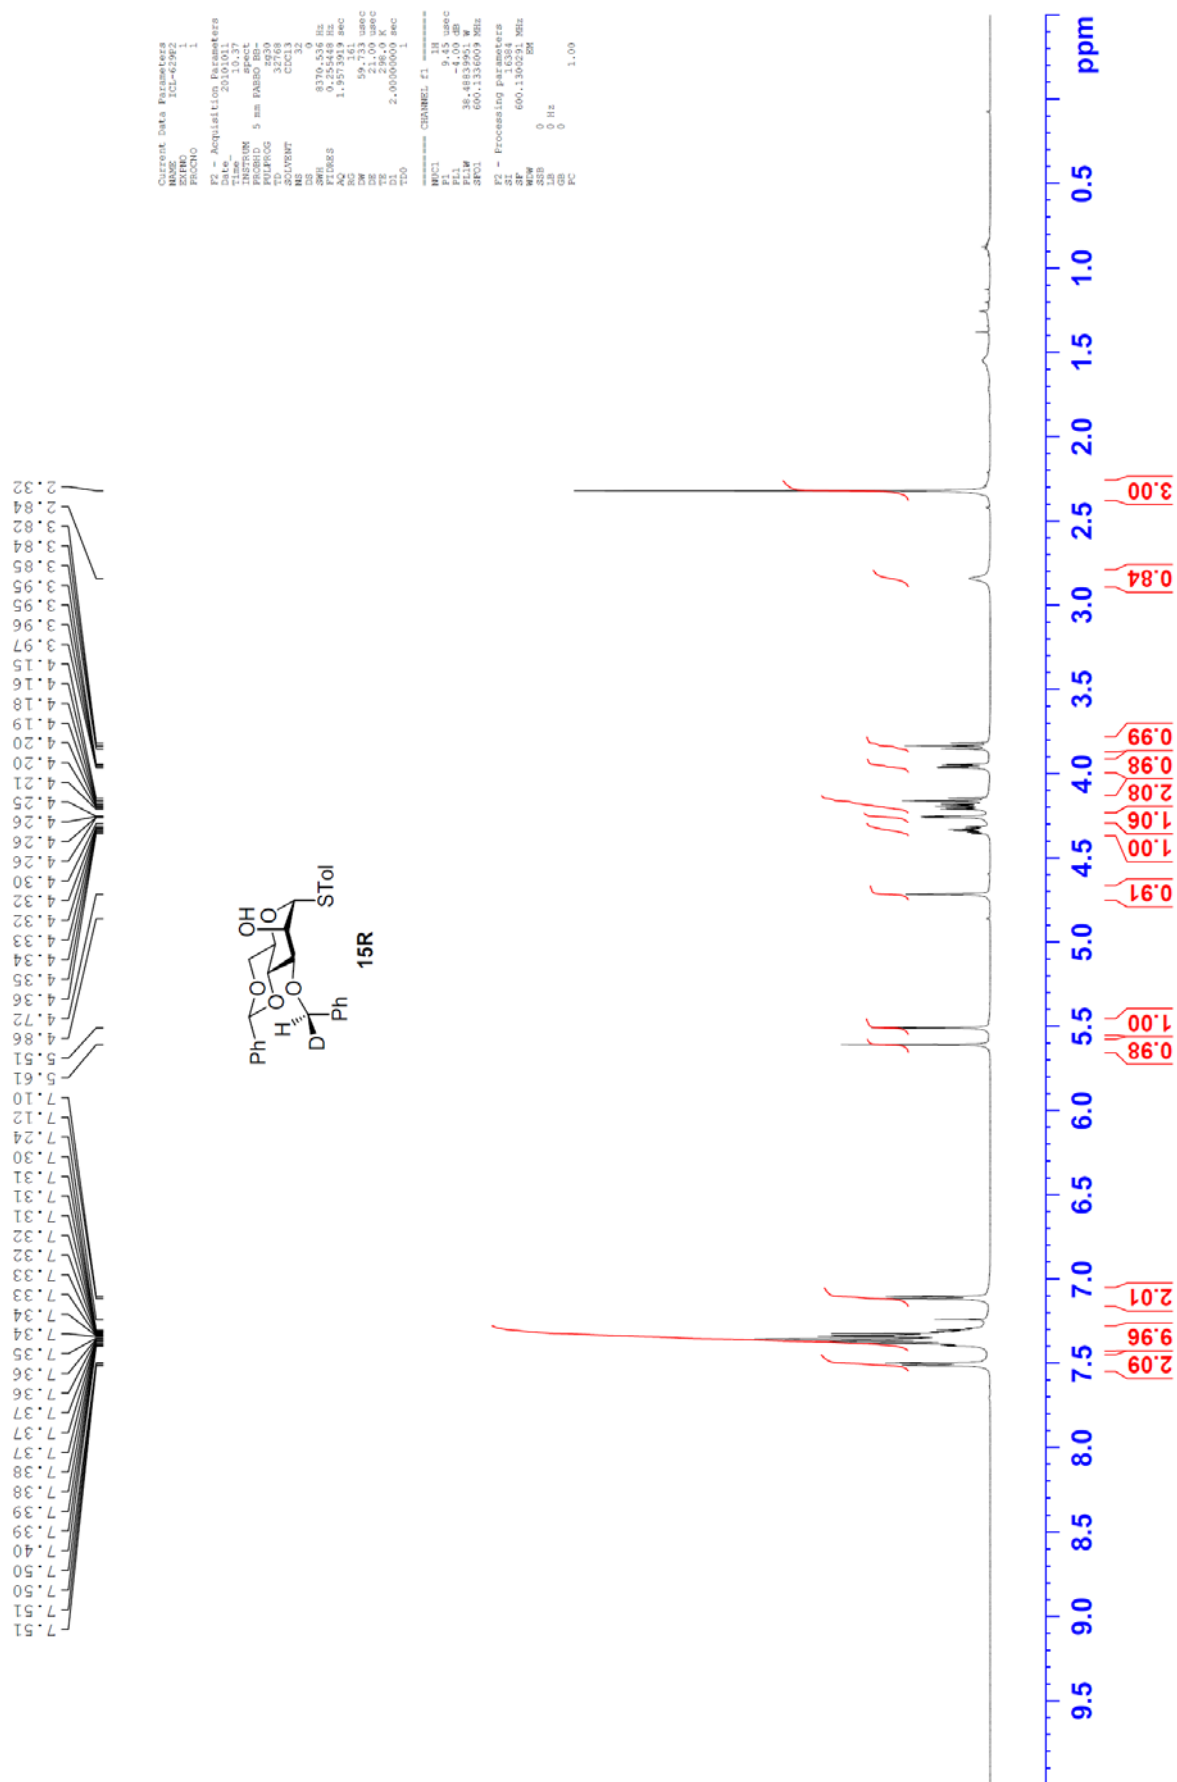

Supplement: c1ob06056b.pdf [file c1ob06056b.pdf]
